# Supplementary material
Source: publisher figshare collection journal article supplement (https://acs.figshare.com/ndownloader/files/4620046)

# Supplementary Information

## **Hybrid plasmonic-photonic nanodevice for label-free few molecules detection**

Francesco De Angelis<sup>1,4</sup>, Maddalena Patrini<sup>2</sup>, Gobind Das<sup>1,4</sup>, Ivan Maksymov<sup>2</sup>, Matteo Galli<sup>2</sup>, Luca Businaro<sup>3</sup>, Lucio Claudio Andreani<sup>2</sup> & Enzo Di Fabrizio<sup>1,3,4</sup>

<sup>1</sup>*BIONEM lab, University of Magna Graecia, Campus S. Venuta, Germaneto, viale Europa 88100 Catanzaro, Italy*

<sup>2</sup>*Department of Physics “A. Volta”, University of Pavia, via Bassi 6, 27100 Pavia, Italy*

<sup>3</sup>*TASC National Laboratory, CNR-INFM, Area Science Park – Basovizza, 34012 Trieste, Italy*

<sup>4</sup>*CalMED L.T.D., Campus S. Venuta, Germaneto, viale Europa, 88100 Catanzaro, Italy*

### **Sections:**

- 1. Plasmonic nanoantenna**
- 2. Design and optical response of the overall device**
- 3. Experimental Raman Scattering setup**
- 4. SiO<sub>x</sub> deposition on nanoantenna**
- 5. Micro-analysis of nanoantenna**
- 6. Raman Scattering measurements on SiO<sub>x</sub> nanoparticles deposited on nanoantenna**
- 7. Nanomanipulator**
- 8. Raman Scattering measurements on QD samples**
- 9. Raman Scattering measurements on single QD on nanoantenna, on and off resonance and FDTD simulation**
- 10. SENSE on Atomic Force Microscope cantilever**

## 1. Plasmonic nanoantenna.

SEM images of gold tips of different nanoantennae. In panel **a**, the tip with the Photonic Crystal (PC) on the background is shown, while in panel **b**, a detail of the tip with an higher SEM magnification ( $1.2 \times 10^6$ ) is shown. A radius of curvature of less than 10 nm can be clearly estimated. Panels **c** and **d**, show our present fabrication capabilities.

**a**

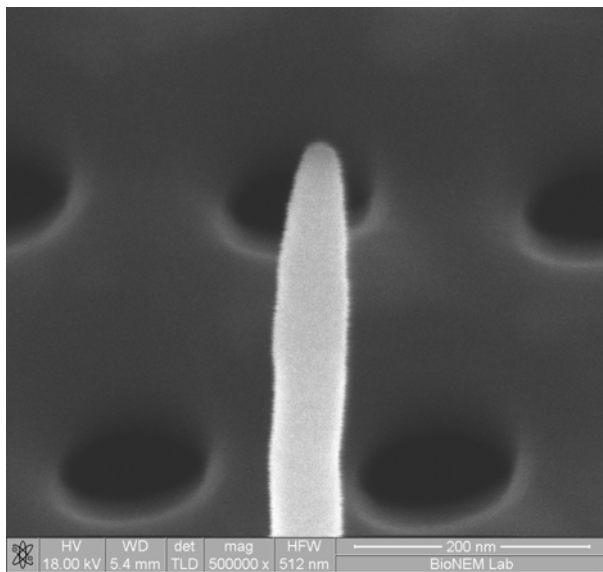

**b**

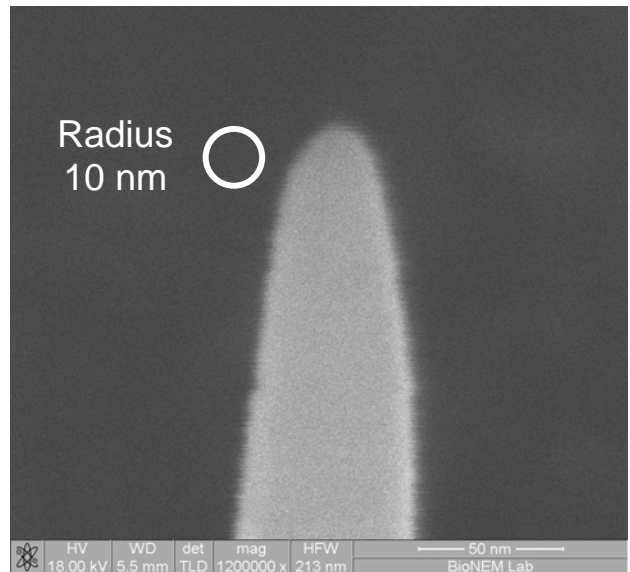

**c**

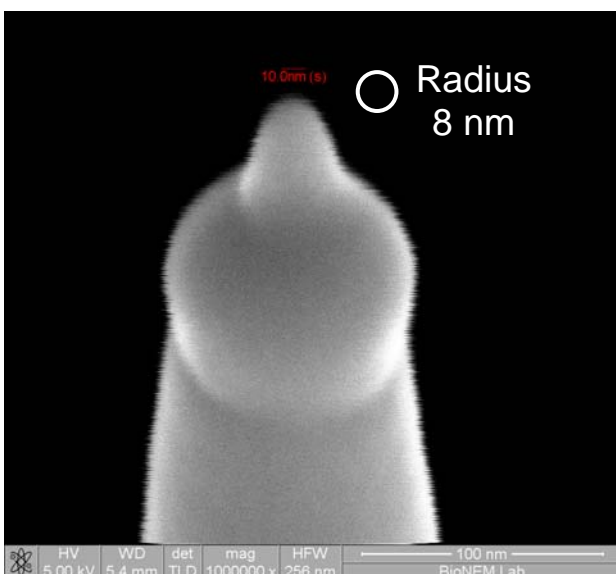

**d**

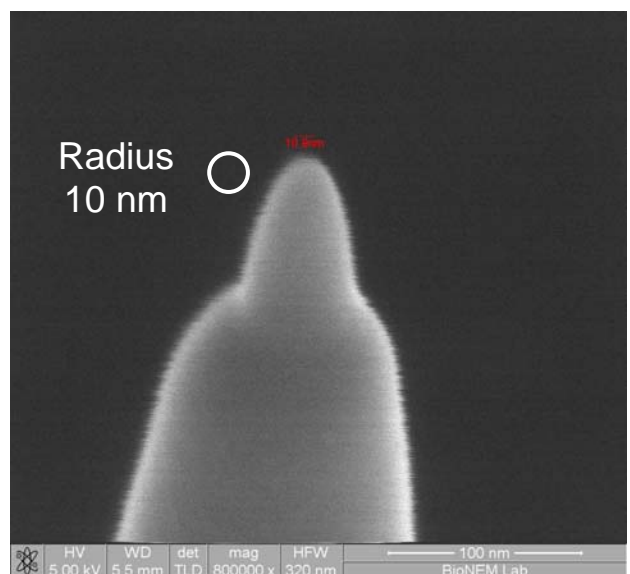

## 2. Design and optical response of the overall device.

The PC structure of the L3-type cavity is designed by a guided-mode expansion method. Dealing with an isolated cavity, we consider only TE-like modes for which the triangular lattice has a photonic band gap in all directions. Also, we further exploit mirror symmetry (for the isolated PC cavity and for the cavity with the nanoantenna) related to reflection with respect to the vertical bisecting plane. Then, the SPP optical response of the actual device is simulated by using a FDTD (Finite Difference Time Domain) code. Its algorithm is supplemented with the CPML (Convolution Perfectly Matched Layers) absorbing boundary conditions<sup>25</sup> and the Drude-Lorentz model for Gold (with plasma frequency  $\hbar \omega_p = 8$  eV and broadening  $\Gamma = 0.015 \omega_p$ ) that models the optical response of the nanoantenna material. The 3D computational domain is divided into  $224 \times 276 \times 107$  cells. The volume of each cell is  $15.6 \times 15.6 \times 11.1 \text{ nm}^3$ . This cell size allows us a simulation of a tip radius of curvature of 20 nm at best. Such a spatial resolution gives rise to the step in time of  $0.248 \times 10^{-16}$  seconds. A modulated Gaussian pulse covering the spectral range 2.2 - 2.45 eV is emanated from a point source situated at the centre of the cavity just below the basis of the metallic nanoantenna. The detector is situated just above the PC cavity or above the tip of the nanoantenna depending on simulation conditions.

Notice that the color scale maps in figure are in arbitrary units but the numerical values reported are in the correct relative intensity values. The adopted reference system  $x, y, z$  is sketched for clarity in the centre of figure. **a**, FDTD calculation of the optical response of the PC cavity (the source is placed below the PC membrane and the detector is just above the membrane plane) in the photonic stop band region (2.2-2.5 eV) evidencing the fundamental cavity mode (red line) as compared to that of the PC cavity with the plasmonic nanoantenna on top (blue line). **b and c**,  $E_x^2$  and  $E_y^2$  spatial 2D profile (in arbitrary units) in the  $xy$  plane of the bare plasmonic nanoantenna on a Silicon Nitride membrane calculated at  $\lambda = 514$  nm. **d and e**,  $E_x^2$  and  $E_y^2$  spatial 2D profile (in arbitrary units) in the  $xy$  plane of plasmonic nanoantenna on the PC cavity calculated at  $\lambda = 514$  nm. These results confirm the concentration of the e.m. field operated by the PC cavity at the resonance frequency (notice the different color scale in the lower right panel).

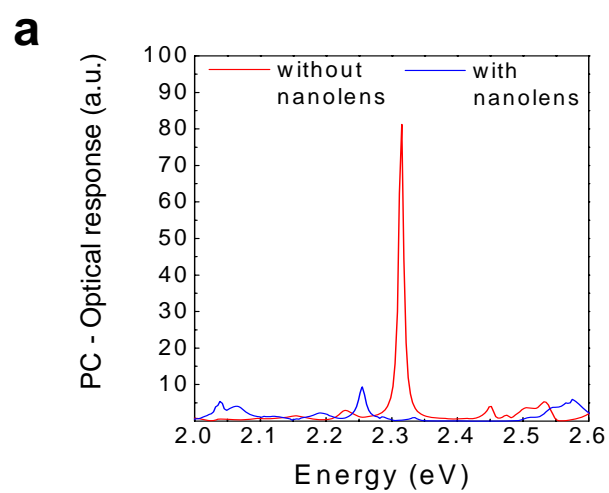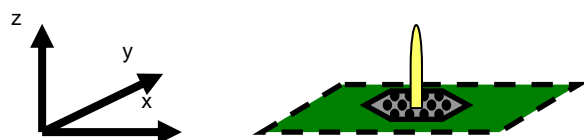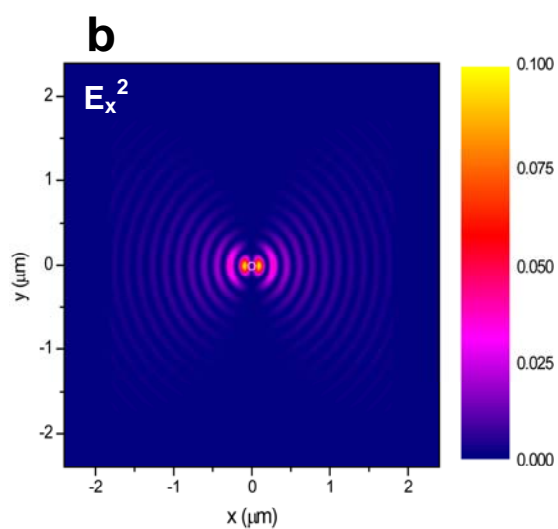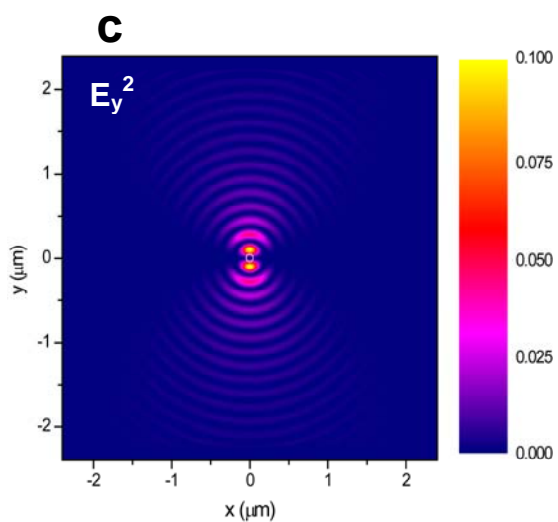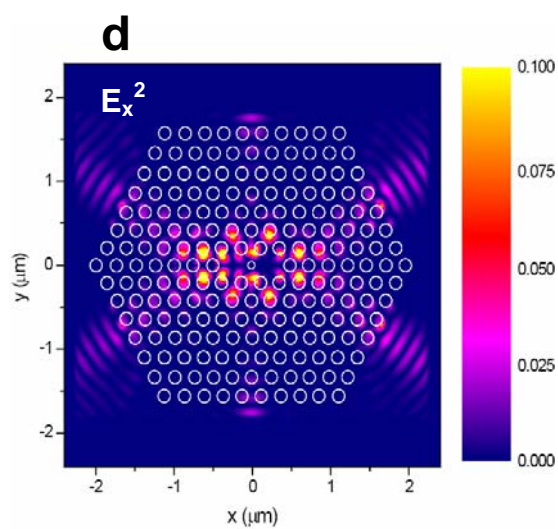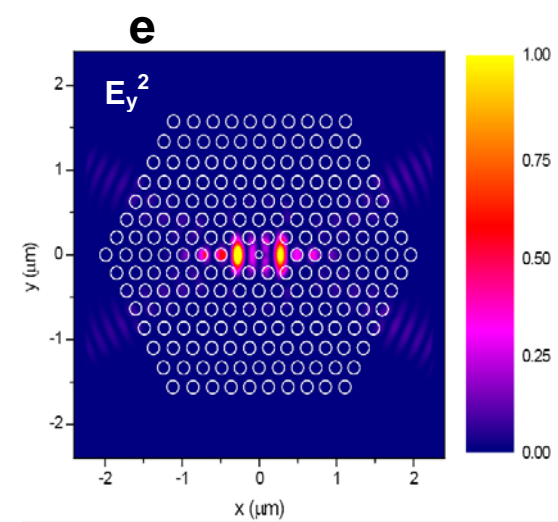

### 3. Experimental Raman Scattering setup.

Detailed setup for Raman Scattering experiments in transmission geometry (inVia Renishaw, 2006). The device is mounted on the microscope stage that allows very fine control of the nanoantenna position with respect to the microscope objective. The resolution of the piezo-electric positioning system of the stage is 100 nm in all x,y, and z axis directions.

The sample is illuminated from the bottom of the nanoantenna and PC cavity by unpolarized laser beam at 514 nm wavelength and power 0.18 mW. The collection of the Raman scattering signal is done in transmission with a direct microscope using 150X objective (NA - 0.95) with accumulation time ( $T_{\text{int}}$ ) of 150 seconds.

Confocal Raman measurements are performed for all samples described in this paper, namely, for SiO<sub>x</sub>, QD, and BTH monolayer. Moreover, Raman measurements on nanoantenna only (no PC cavity) are also performed.

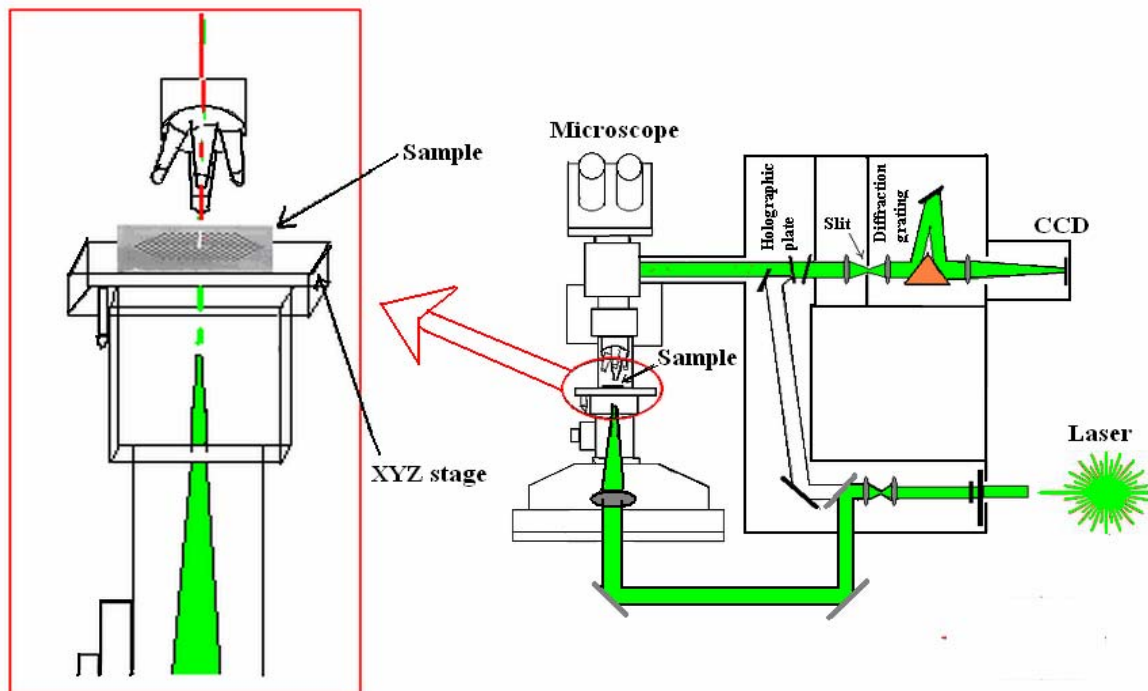

#### 4. SiO<sub>x</sub> deposition on nanoantenna.

SEM images of the tip of different nanoantennas after the deposition of SiO<sub>x</sub>. The deposition of SiO<sub>x</sub> is done by using electron beam induced deposition from the precursor gas TEOS (tetraethylorthosilicate). The SiO<sub>x</sub> nanoparticle is selectively deposited in a specific position by focusing and positioning the electron beam, with nanometer precision with aid of a dedicated software. The electron beam is “on” for few seconds in the presence of a stationary flow of precursor gas. SiO<sub>x</sub> is deposited, for each sample, at three different positions: **a**, at the apex; **b**, near the apex; **c**, along the wall of the nanoantenna. **d**, A thin layer of carbon is overgrown on nanoantenna surface during SiO<sub>x</sub> deposition. **e**, SEM image showing a carbon layer purposely overgrown after 3 minutes of exposure without the SiO<sub>x</sub> gas precursor, but with residual air in the SEM chamber.

**a**

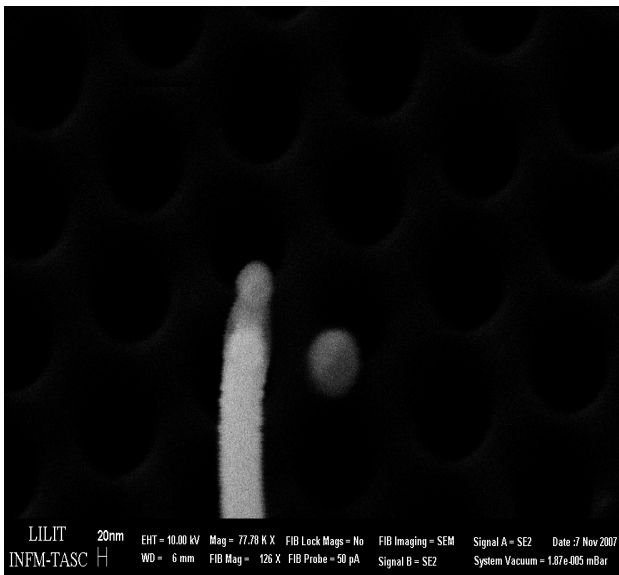

**b**

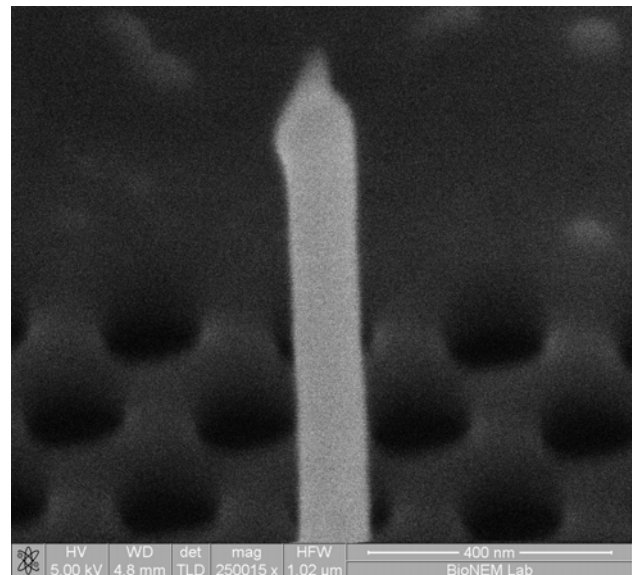

**c**

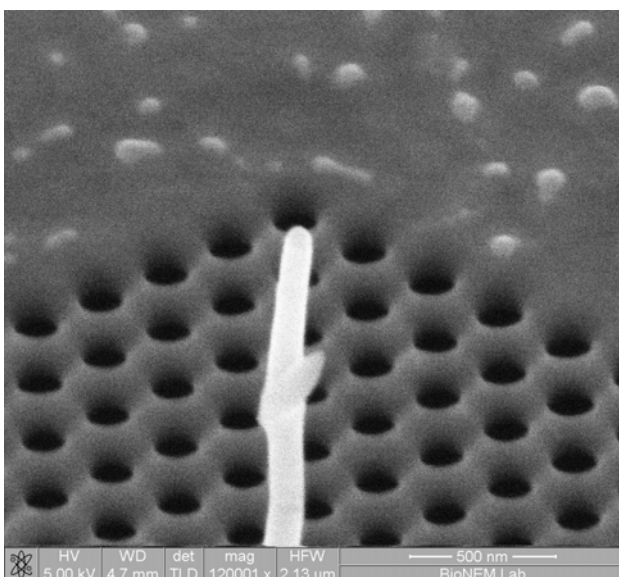

**d**

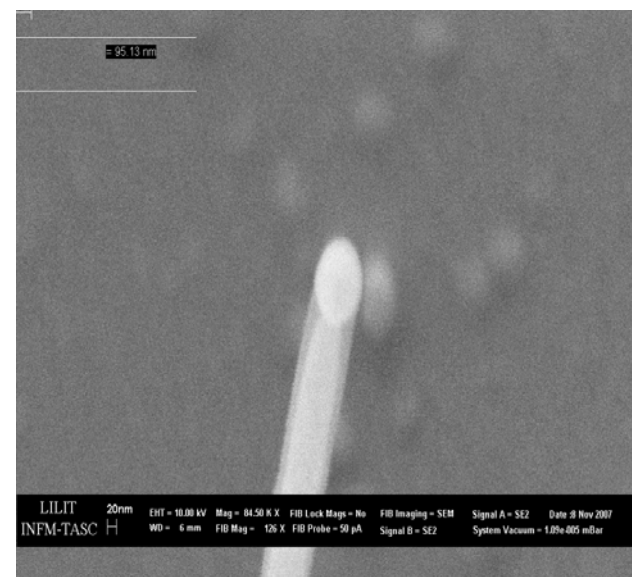

**e**

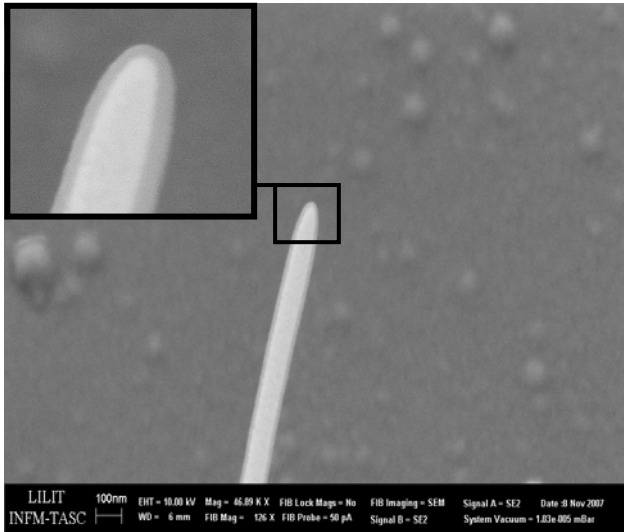

### 5. Micro-analysis of the nanoantenna.

X-ray micro-analysis spectra of the fabricated nanoantenna. The analysis clearly reveals the presence of Platinum/Carbon deposited from the gas precursor, and the presence of Gold covering the nanoantenna. To be noted the residual presence of Carbon co-deposited with Platinum, also detected in enhanced Raman Scattering measurements.

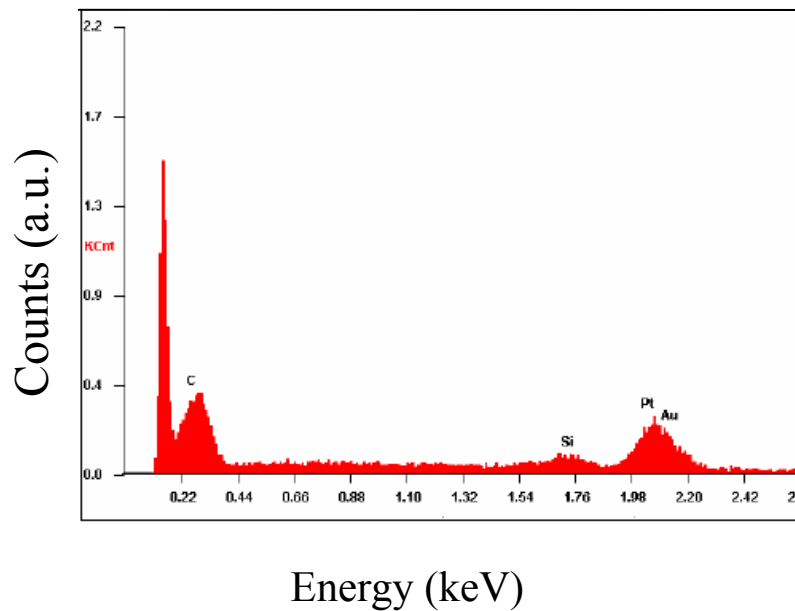

## 6. Raman Scattering measurements on SiO<sub>x</sub> nanoparticles deposited on nanoantenna.

Raman Intensity mapping and maximization: **a**, Optical image of the PC cavity when performing the 2D map of Raman Scattering intensity at defined wavelength. **b**, 2D map of Raman Scattering intensity at  $\lambda=479.6\text{ nm}$  as measured on the SiO<sub>x</sub> nanoparticle deposited at the nanoantenna tip apex in S1 configuration (see text). **c**, z-scan of the Raman Scattering intensity at 479.6 nm, as measured along the nanoantenna for a total scan range of 6  $\mu\text{m}$  in S1 configuration. **d**, Raman Scattering spectrum of a SiO<sub>x</sub> bulk sample on gold coated Silicon Nitride membrane, deposited at the same experimental condition of SiO<sub>x</sub> nanoparticles.

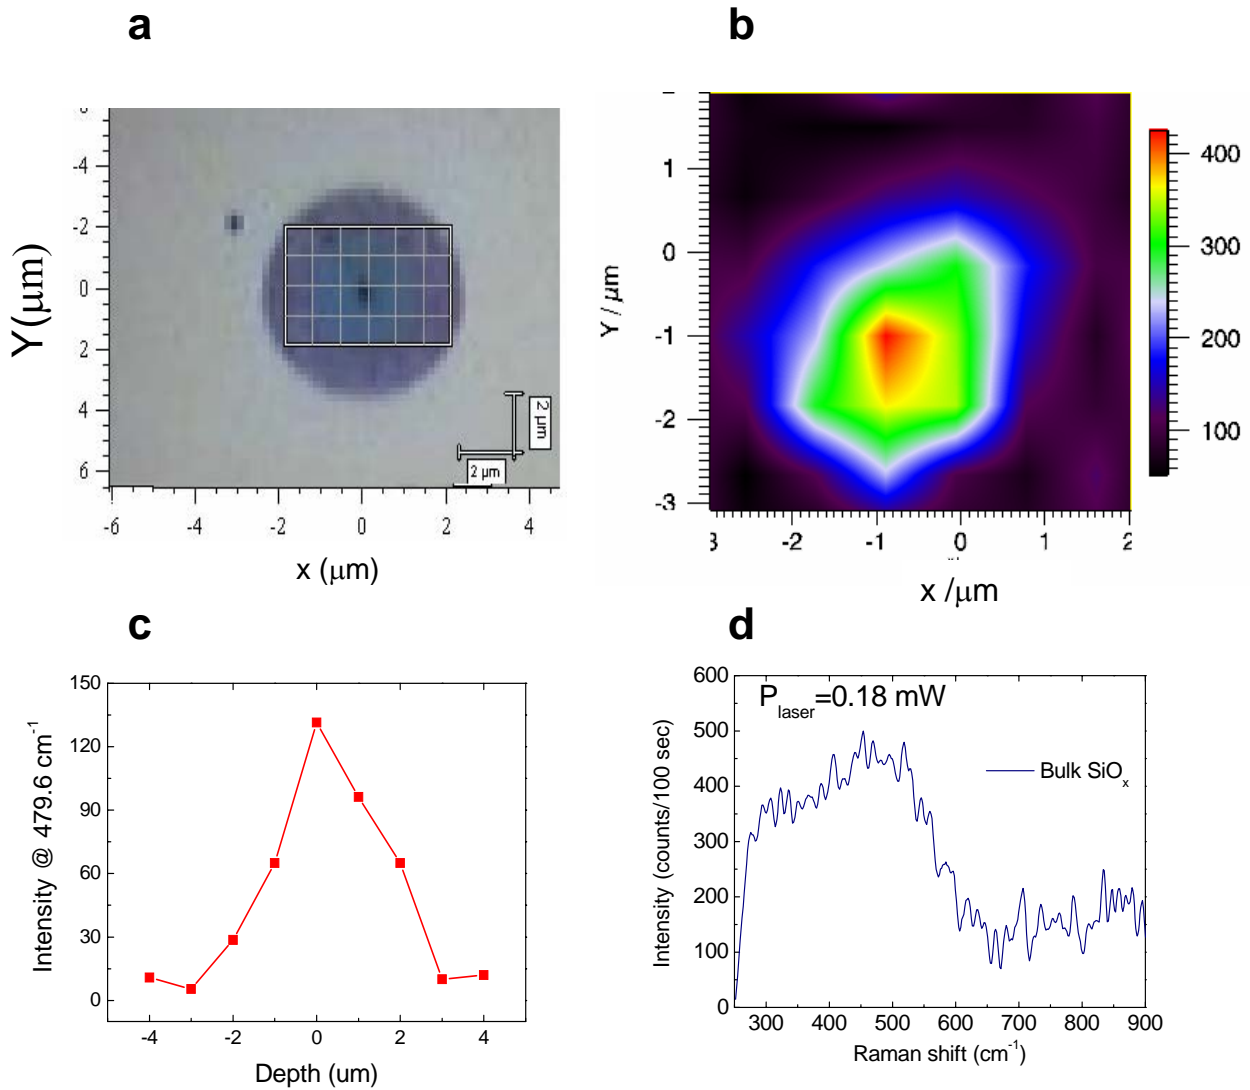



## 7. Nanomanipulator.

The Nanomanipulator mounted in the SEM vacuum chamber; in the inset a SEM image of the manipulator tip over the sample. The tip positioning system is controlled by piezoelectric motors with 3 additional degrees of freedom with respect to the SEM stage as indicated in the picture (Z: out-of-plane rotation, resolution=5 nm; X: in-plane rotation, resolution=3.5 nm; Y: tip axial shift, resolution=0.25 nm).

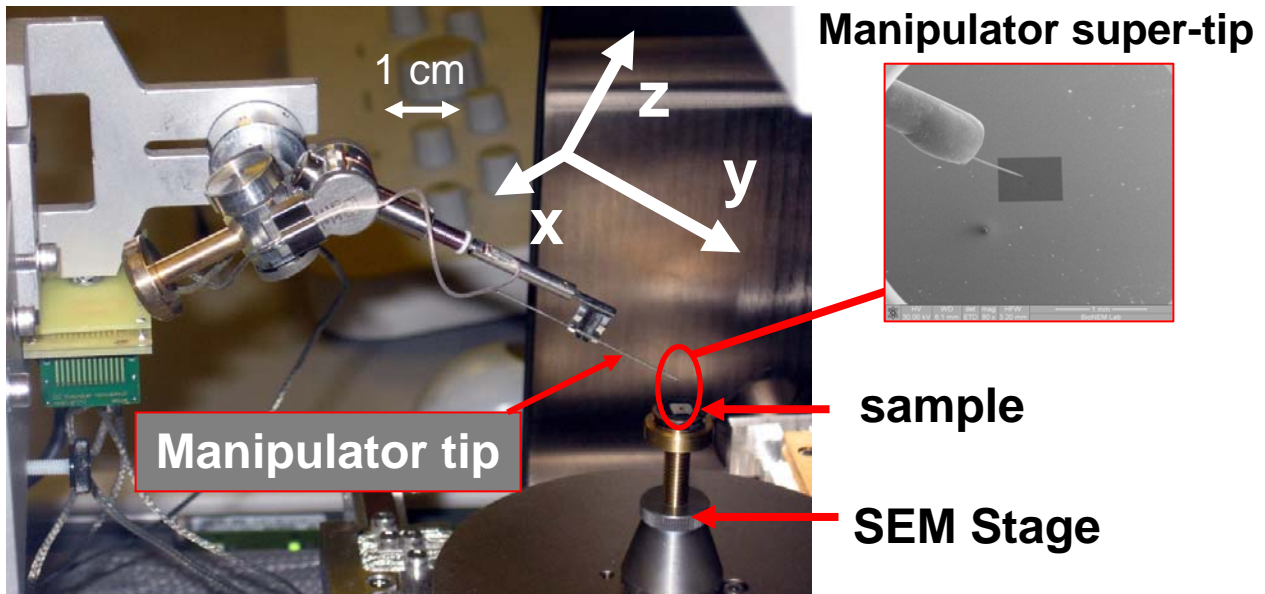

## 8. Raman Scattering measurements on QD samples.

**a**, SEM image of a nanoantenna with few QDs deposited at the apex. **b**, SEM image of a definite volume of QDs spun on a Silicon Nitride membrane. After the spinning the sample is patterned in order to obtain a definite QDs volume, (a cylinder of 1.2  $\mu\text{m}$  diameter and 200 nm in height). **c**, 2D map in the xy plane of Raman Scattering intensity at  $3080\text{ cm}^{-1}$  as measured on the QD on nanoantenna.

The sample in **b** allows us to obtain a direct evaluation of the enhancement factor (that results to be about  $10^5$ ) in bleaching conditions. For these QDs the fluorescence is bleached after 2 minutes under laser exposure at power density equal to  $2.7\text{ KW/cm}^2$ , as obtained for single QD<sup>1</sup>.

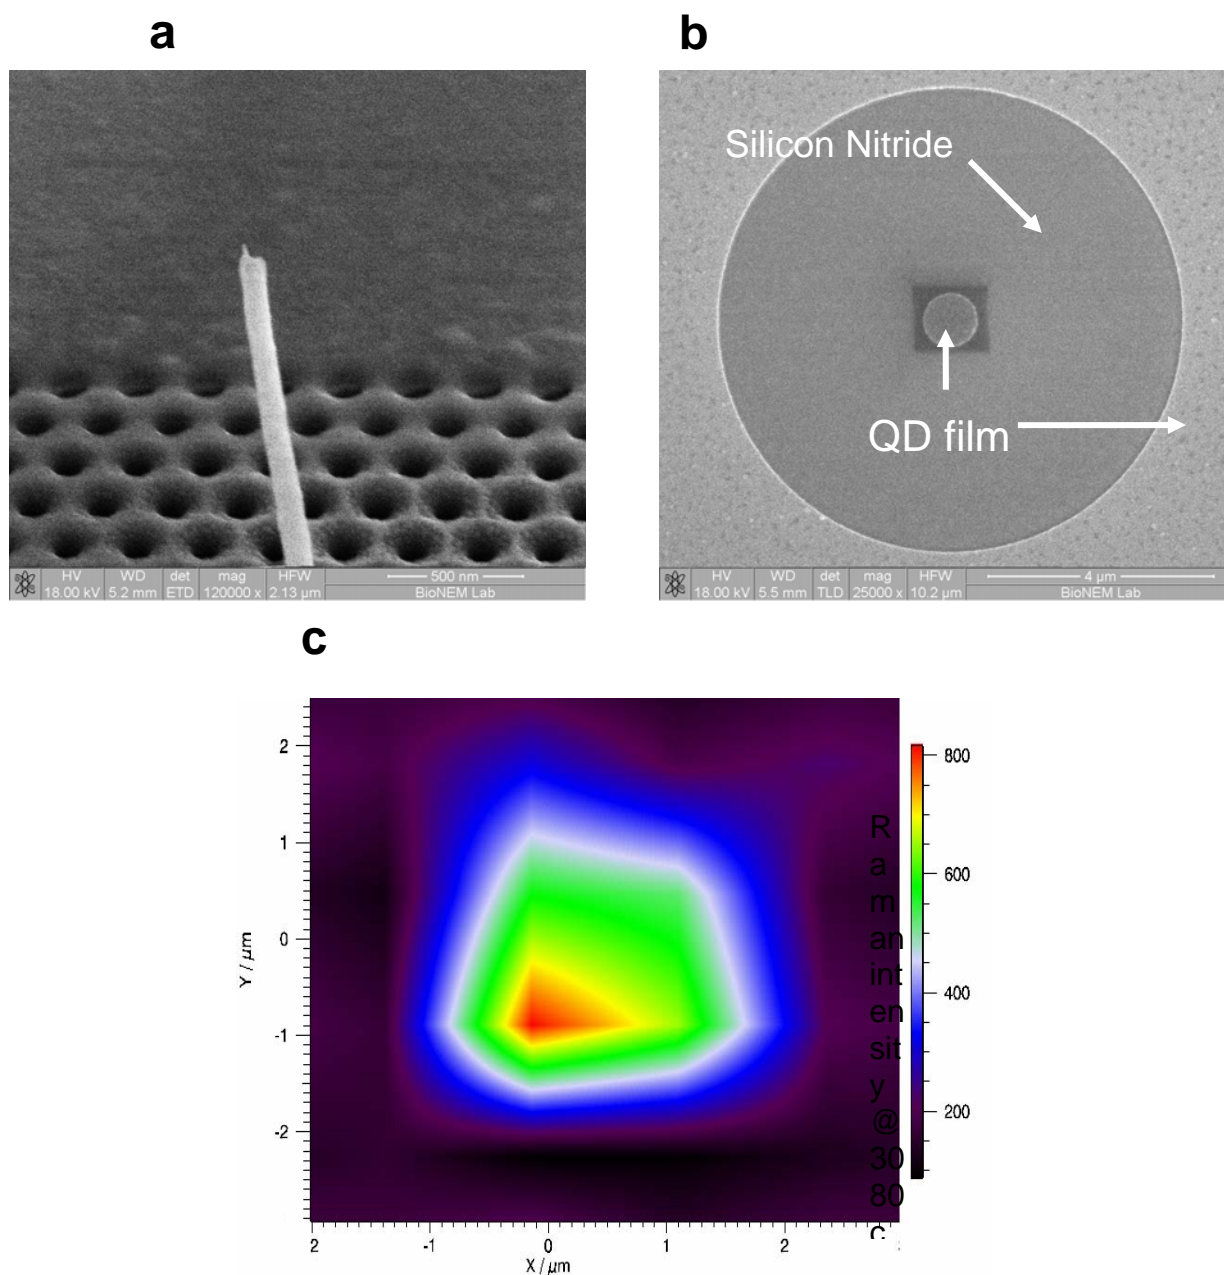

<sup>1</sup> Lee S.F. and Osborne M.A., *J. Am Chem. Soc.* **129**, 88936 (2007)

## 9. Raman Scattering measurements on single QD on nanoantenna, and FDTD simulation.

**a**, Raman scattering spectra of single QD deposited at nanoantenna tip (P=0.18 mW, T=150s) excited at resonance wavelength,  $\lambda=514$  nm

**d**, 2D map of FDTD simulation of  $E^2 = E_x^2 + E_y^2$  along the nanoantenna, on resonance at  $\lambda_{\text{exc}}=514$  nm,.

These results confirm the strong enhancement of the e.m. field intensity at the tip at the resonance frequency (notice the different color scales): the ratio between resonant and non-resonant condition is by a factor of  $10^2$ - $10^3$ , depending on exact position.

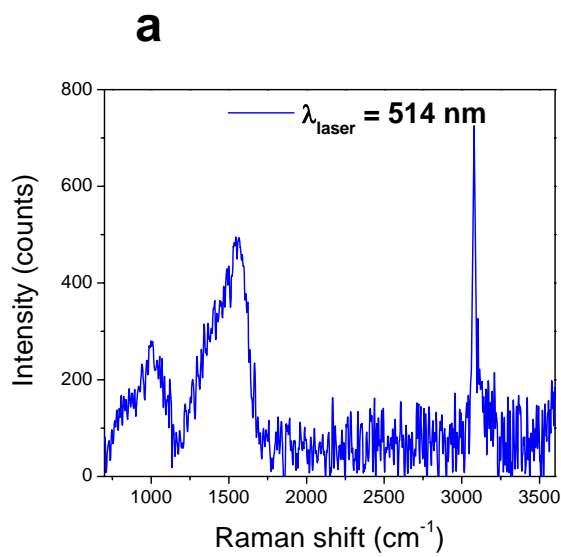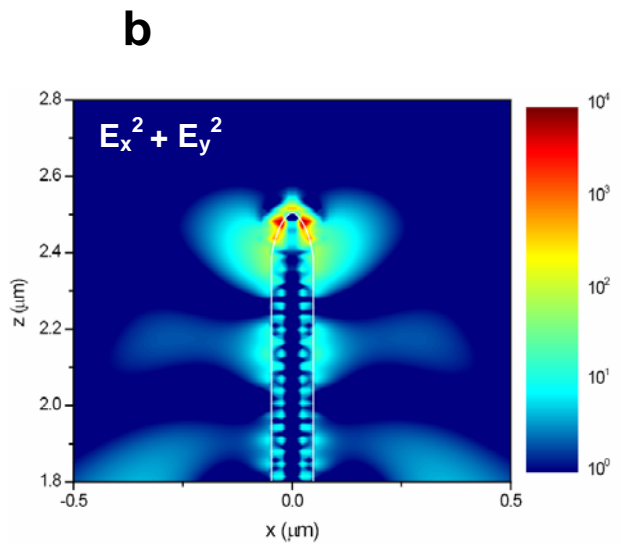

## 10. SENSE on Atomic Force Microscope cantilever.

**a**, Overview of an AFM cantilever with the PC cavity and plasmonic nanoantenna fabricated on its surface. The silicon nitride cantilever is locally thinned on one side in order to obtain a membrane thickness of 100 nm necessary for the fabrication of the desired a PC cavity. The local thinning of the membrane doesn't affect the mechanical properties of the cantilever. The aim of this architecture is to combine Atomic Force Microscope and Raman Scattering technique. The performances of such nanoantenna as AFM super-tip has been tested by the authors to obtain AFM setup topography images in wet conditions (the images can be supplied upon request to the authors). In the next future the AFM will be combined to Raman Scattering spectrometer. **b**, Details of the PC cavity and nanoantenna. The fabrication quality is comparable to that obtained on a  $\text{Si}_3\text{N}_4$  membrane.

**a**

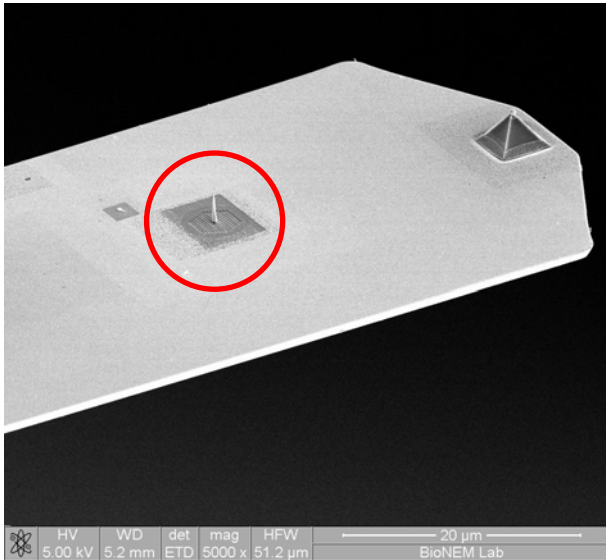

**b**

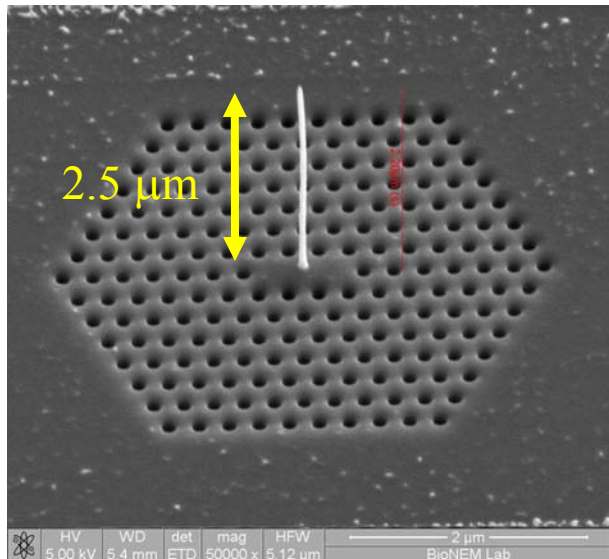

Supplement: Supplementary file 1 [file 4620046]
